# Supplementary material
Source: PubMed Central journal article supplement (PMC7856768)
Supplement: 12920_2021_887_MOESM8_ESM.pdf [file 12920_2021_887_MOESM8_ESM.pdf]

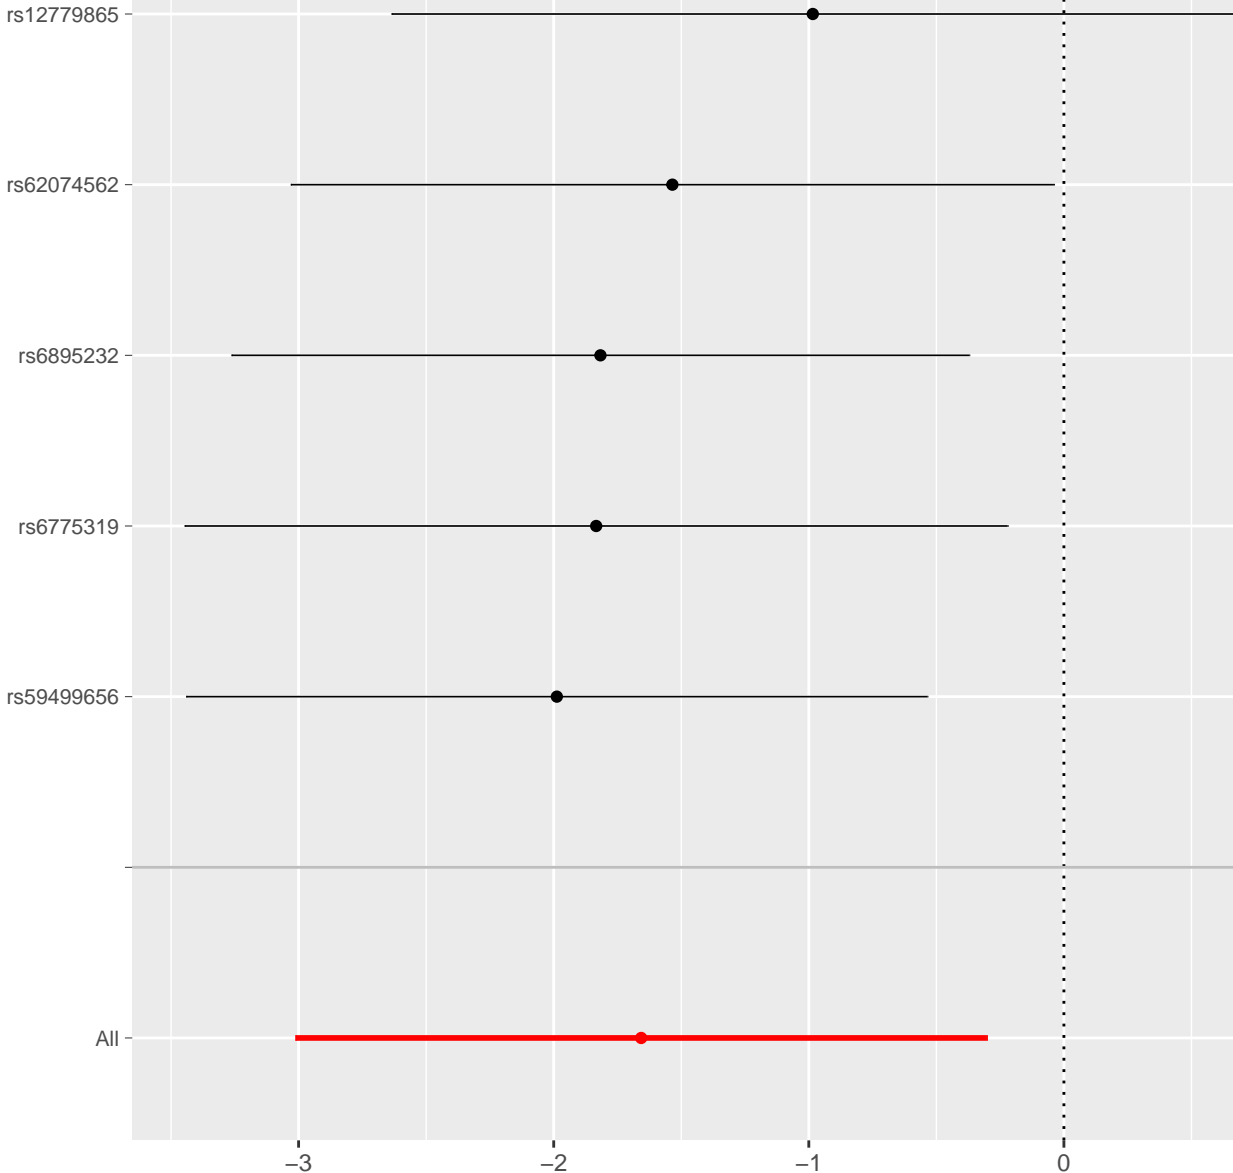

MR leave-one-out sensitivity analysis for 'Physical activity' on 'Severe respiratory COVID-19'
