# Supplementary material
Source: PubMed Central journal article supplement (PMC7856768)

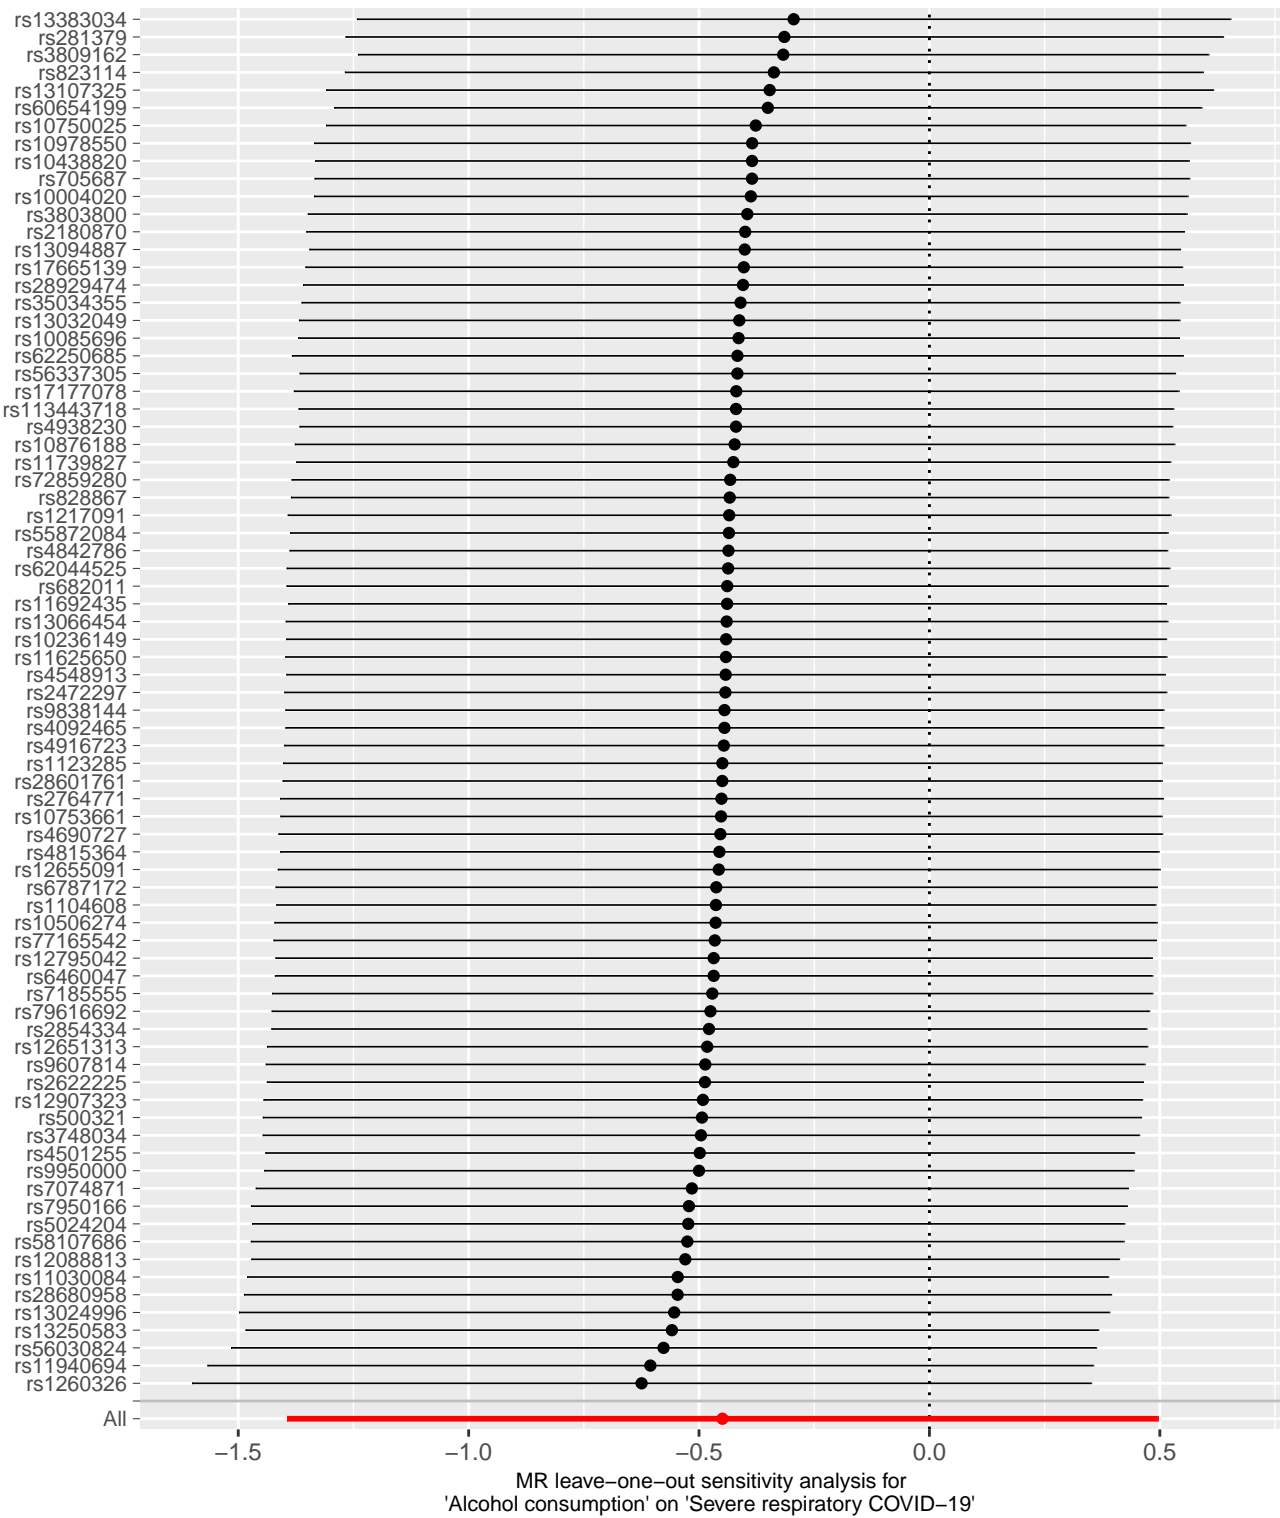

Supplement: 12920_2021_887_MOESM12_ESM.pdf [file 12920_2021_887_MOESM12_ESM.pdf]
