# Supplementary material
Source: PubMed Central journal article supplement (PMC7856768)
Supplement: 12920_2021_887_MOESM13_ESM.pdf [file 12920_2021_887_MOESM13_ESM.pdf]

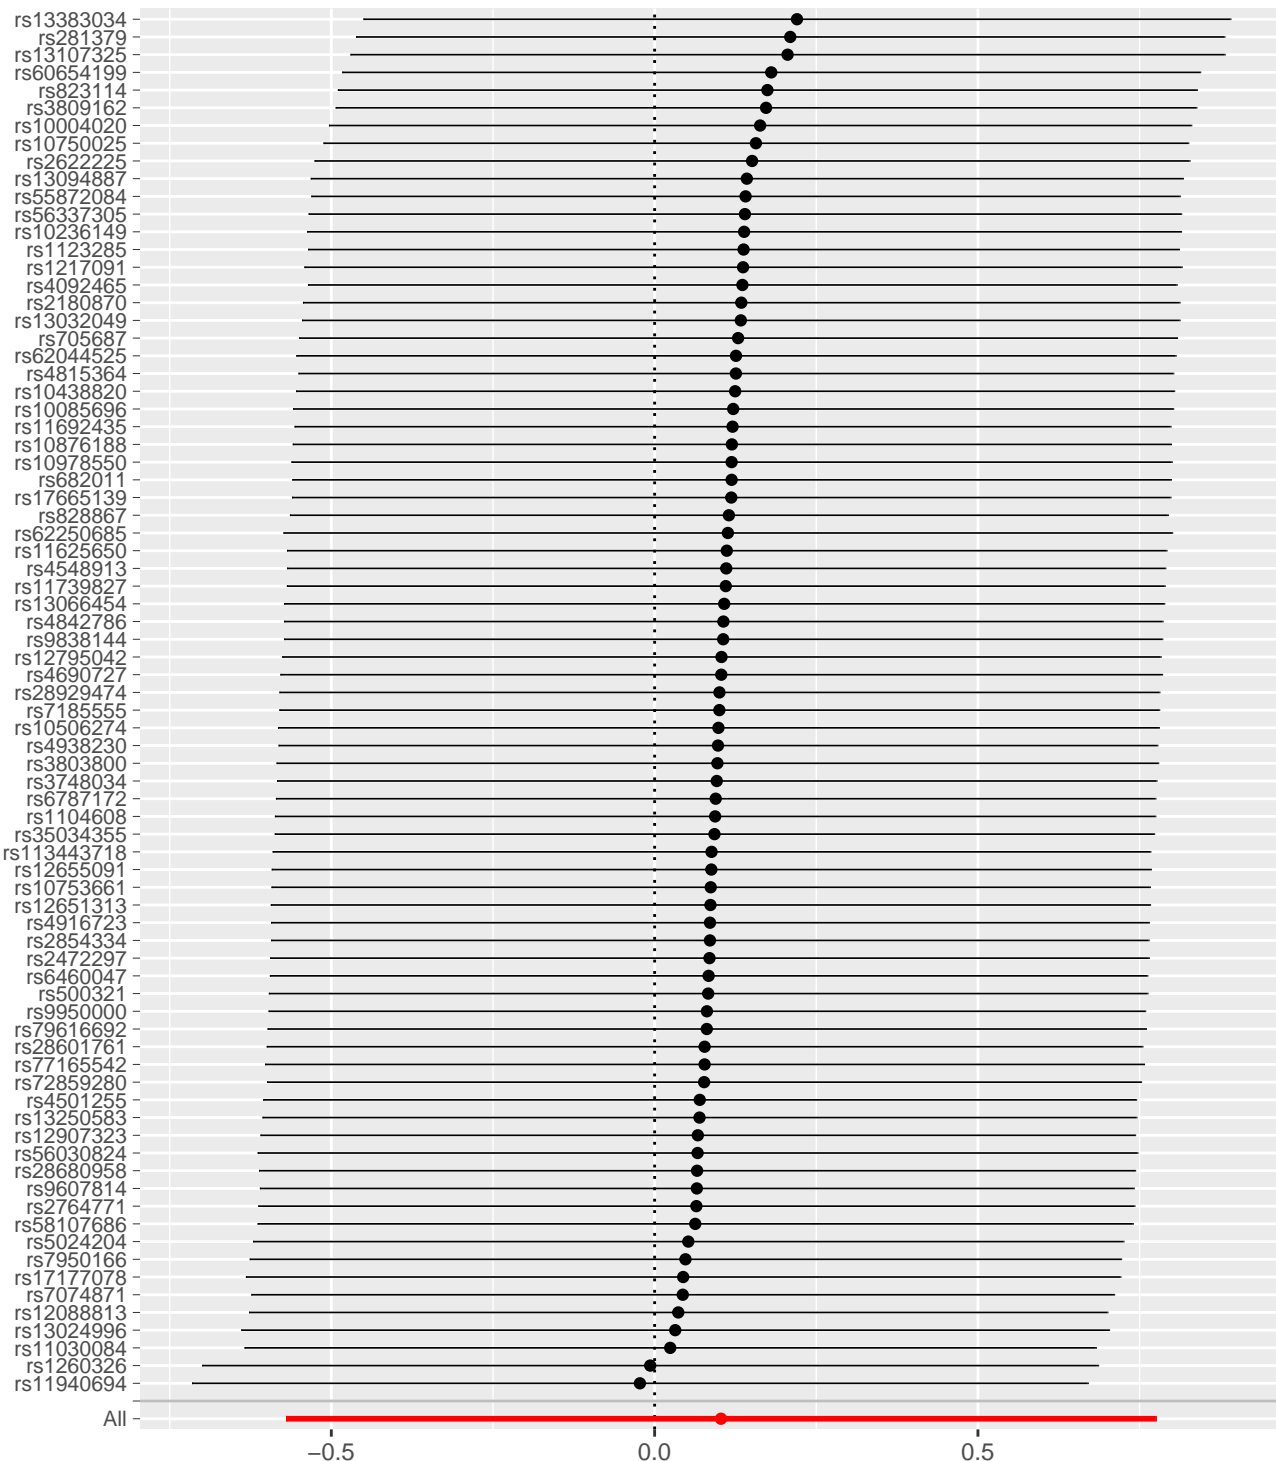

MR leave-one-out sensitivity analysis for 'Alcohol consumption' on 'COVID-19 hospitalization'
