# Supplementary material
Source: PubMed Central journal article supplement (PMC7856768)

### MR Method

- Inverse variance weighted
- MR Egger

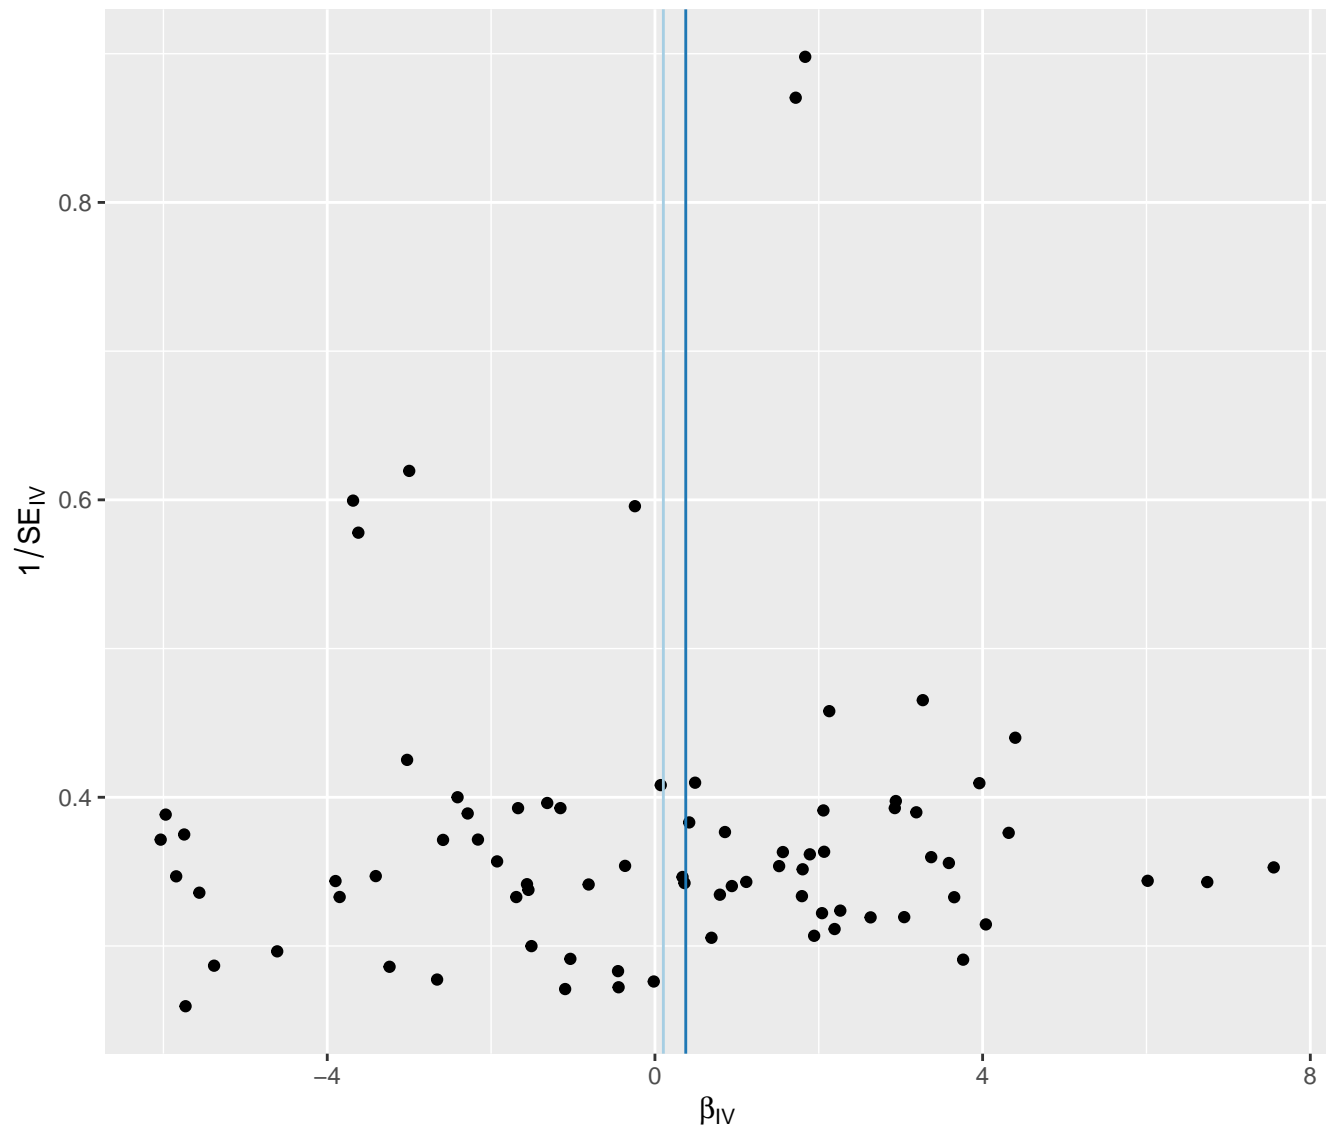

Supplement: 12920_2021_887_MOESM19_ESM.pdf [file 12920_2021_887_MOESM19_ESM.pdf]
